# Supplementary material for: Prevalence of Vitamin B12 and Folate Deficiencies in Indian Children and Adolescents
Source: MDPI journal article supplement (doi:10.3390/nu15133026), 2023-07-03
Supplement: s1 [file s1]

# Prevalence of Vitamin B<sub>12</sub> and Folate Deficiencies in Indian Children and Adolescents

Tattari Shalini <sup>1</sup>, Raghu Pullakhandam <sup>1</sup>, Santu Ghosh <sup>2</sup>, Bharati Kulkarni <sup>1</sup>, Hemalatha Rajkumar <sup>1</sup>, Harshpal S. Sachdev <sup>3</sup>, Anura V. Kurpad <sup>2</sup> and Geerreddy Bhanuprakash Reddy <sup>1,\*</sup>

<sup>1</sup> National Institute of Nutrition, Jamai-Osmania, Tarnaka, Hyderabad 500007, India

<sup>2</sup> St. John's Medical College, Bangalore 560034, India; santu.g@stjohns.in (S.G.)

<sup>3</sup> Sitaram Bhartia Institute of Science and Research, New Delhi 110016, India

\* Correspondence: geerreddy@yahoo.com or reddyg.bp@icmr.gov.in; Tel.: +91-40-27197252

**Running title:** Vitamin B<sub>12</sub> and folate status in Indian children and adolescents

**Supplementary Table S1.** Comparison of characteristics of the study (vitamin B12 and folate) sample with the total survey sample.

| Characteristics    |                    | 1-4 years                 |                      |                          | 5-9 years                      |                      |                          | 10-19 years                      |                      |                          |
|--------------------|--------------------|---------------------------|----------------------|--------------------------|--------------------------------|----------------------|--------------------------|----------------------------------|----------------------|--------------------------|
|                    |                    | Vitamin B12<br>% (95% CI) | Folate<br>% (95% CI) | CNNS total<br>% (95% CI) | Vitamin B12<br>% (95% CI)      | Folate<br>% (95% CI) | CNNS total<br>% (95% CI) | Vitamin B12<br>% (95% CI)        | Folate<br>% (95% CI) | CNNS total<br>% (95% CI) |
| Age                | 1-2 years          | 38.6<br>(36.4-40.9)       | 38.7<br>(36.7-40.7)  | 48.6<br>(47.5-49.6)      | 5-6 years: 39.7<br>(38.0-41.4) | 38.8<br>(37.3-40.3)  | 40.4<br>(39.4-41.4)      | 10-14 years: 52.8<br>(51.4-54.3) | 52.6<br>(51.3-53.9)  | 51.8<br>(51.2-52.5)      |
|                    | 3-4 years          | 61.4<br>(59.1-63.6)       | 61.3<br>(59.3-63.3)  | 51.4<br>(50.4-52.5)      | 7-9 years: 60.3<br>(58.6-62.0) | 61.2<br>(59.7-62.7)  | 59.6<br>(58.6-60.6)      | 15-19 years: 47.2<br>(45.7-48.6) | 47.4<br>(46.1-48.7)  | 48.2<br>(47.5-48.8)      |
| Sex                | Boys               | 52.9<br>(50.3-55.4)       | 52.5<br>(50.0-55.0)  | 51.4<br>(50.3-52.6)      | 51.6<br>(49.8-53.3)            | 51.2<br>(49.4-52.9)  | 50.4<br>(49.4-51.4)      | 50.6<br>(48.6-52.5)              | 50.6<br>(48.8-52.4)  | 49.9<br>(48.8-50.9)      |
|                    | Girls              | 47.1<br>(44.6-49.7)       | 47.5<br>(45.0-50.0)  | 48.6<br>(47.4-49.7)      | 48.4<br>(46.7-50.2)            | 48.8<br>(47.1-50.6)  | 49.6<br>(48.6-50.6)      | 49.4<br>(47.5-51.4)              | 49.4<br>(47.6-51.2)  | 50.1<br>(49.1-51.2)      |
| Residence          | Urban              | 24.9<br>(21.7-28.4)       | 25.7<br>(22.5-29.1)  | 23.8<br>(21.4-26.3)      | 23.6<br>(20.7-26.8)            | 25.1<br>(22.1-28.2)  | 24.2<br>(21.8-26.8)      | 25.2<br>(22.1-28.6)              | 25.7<br>(22.6-29.0)  | 24.7<br>(22.3-27.4)      |
|                    | Rural              | 75.1<br>(71.6-78.3)       | 74.3<br>(70.9-77.5)  | 76.2<br>(73.7-78.6)      | 76.4<br>(73.2-79.3)            | 74.9<br>(71.8-77.9)  | 75.8<br>(73.2-78.2)      | 74.8<br>(71.4-77.9)              | 74.3<br>(71.0-77.4)  | 75.3<br>(72.6-77.7)      |
| Mothers' Schooling | Primary            | 34.3<br>(31.7-36.9)       | 34.6<br>(31.9-37.3)  | 37.8<br>(35.9-39.9)      | 47.8<br>(45.4-50.3)            | 47.9<br>(45.6-50.3)  | 49.3<br>(47.4-51.2)      | 16.3<br>(14.3-18.4)              | 15.9<br>(14.1-18.0)  | 14.6<br>(13.5-15.9)      |
|                    | Secondary          | 44.3<br>(41.8-46.8)       | 43.6<br>(41.3-46.0)  | 41.8<br>(40.3-43.3)      | 40.1<br>(38.0-42.3)            | 39.8<br>(37.8-41.8)  | 37.9<br>(36.5-39.3)      | 68.7<br>(66.2-71.1)              | 69.3<br>(67.0-71.5)  | 69.1<br>(67.7-70.4)      |
|                    | Higher Secondary   | 10.8<br>(9.3-12.5)        | 11.4<br>(9.9-13.1)   | 10.0<br>(9.2-10.9)       | 6.7<br>(6.0-7.6)               | 6.9<br>(6.2-7.8)     | 6.7<br>(6.2-7.3)         | 9.7<br>(7.7-12.1)                | 9.5<br>(7.7-11.6)    | 9.1<br>(8.4-9.9)         |
|                    | Graduation & above | 10.7<br>(9.2-12.4)        | 10.4<br>(9.0-12.0)   | 10.3<br>(9.5-11.2)       | 5.3<br>(4.7-6.1)               | 5.4<br>(4.8-6.1)     | 6.1<br>(5.5-6.6)         | 5.3<br>(4.4-6.3)                 | 5.3<br>(4.5-6.3)     | 7.2<br>(6.5-8.0)         |
| Wealth Index       | Poorest            | 15.9<br>(13.8-18.3)       | 15.8<br>(13.7-18.1)  | 20.3<br>(18.1-22.6)      | 18.1<br>(16.2-20.3)            | 18.0<br>(15.8-20.4)  | 20.0<br>(18.0-22.2)      | 17.8<br>(15.5-20.4)              | 18.3<br>(16.0-20.8)  | 20.0<br>(17.9-22.3)      |
|                    | Poor               | 21.2<br>(18.5-24.1)       | 20.5<br>(17.9-23.4)  | 19.4<br>(18.1-20.8)      | 21.3<br>(19.4-23.3)            | 20.2<br>(18.5-21.9)  | 20.0<br>(18.6-21.4)      | 20.5<br>(18.8-22.3)              | 20.6<br>(18.9-22.3)  | 20.0<br>(18.8-21.2)      |
|                    | Middle             | 22.3<br>(20.4-24.3)       | 21.7<br>(19.9-23.5)  | 20.2<br>(19.0-21.4)      | 21.5<br>(19.9-23.3)            | 21.0<br>(19.4-22.5)  | 20.0<br>(18.9-21.2)      | 21.4<br>(19.8-23.1)              | 20.3<br>(18.8-21.9)  | 20.0<br>(18.9-21.1)      |
|                    | Rich               | 20.8<br>(18.9-22.9)       | 21.7<br>(19.7-23.9)  | 20.0<br>(18.8-21.2)      | 21.0<br>(19.4-22.7)            | 21.6<br>(19.9-23.3)  | 20.0<br>(18.8-21.3)      | 20.9<br>(19.3-22.7)              | 21.0<br>(19.4-22.8)  | 20.0<br>(18.8-21.2)      |
|                    | Richest            | 19.8<br>(17.7-22.0)       | 20.3<br>(18.3-22.5)  | 20.1<br>(18.7-21.6)      | 18.0<br>(16.4-19.8)            | 19.3<br>(17.6-21.1)  | 20.0<br>(18.5-21.6)      | 19.3<br>(17.5-21.2)              | 19.8<br>(17.9-21.8)  | 20.0<br>(18.6-21.5)      |

**Supplementary Table S2.** Prevalence of vitamin B12 and folate deficiency in children and adolescents by socio-demographic and WASH variables.

| Characteristics       |                      | 1-4 years                            |                                   | 5-9 years                            |                                   | 10-19 years                          |                                   |
|-----------------------|----------------------|--------------------------------------|-----------------------------------|--------------------------------------|-----------------------------------|--------------------------------------|-----------------------------------|
|                       |                      | Vitamin B12 deficiency<br>% (95% CI) | Folate deficiency<br>% (95% CI)   | Vitamin B12 deficiency<br>% (95% CI) | Folate deficiency<br>% (95% CI)   | Vitamin B12 deficiency<br>% (95% CI) | Folate deficiency<br>% (95% CI)   |
| Residence             | Urban                | 14.4 <sup>a</sup><br>(9.9-20.4)      | 23.5 <sup>a</sup><br>(20.5-26.8)  | 15.7 <sup>a</sup><br>(11.9-20.4)     | 31.1 <sup>a</sup><br>(27.4-35.0)  | 30.5 <sup>a</sup><br>(27.1-34.0)     | 40.9 <sup>a</sup><br>(35.6-46.3)  |
|                       | Rural                | 13.6 <sup>a</sup><br>(11.4-16.3)     | 22.5 <sup>a</sup><br>(19.5-25.7)  | 17.8 <sup>a</sup><br>(15.7-20.1)     | 26.5 <sup>a</sup><br>(23.7-29.5)  | 31.2 <sup>a</sup><br>(28.2-34.3)     | 33.8 <sup>a</sup><br>(30.7-37.1)  |
| Currently in school   | Yes                  | -                                    | -                                 | 17.4 <sup>a</sup><br>(15.5-19.4)     | 28.1 <sup>a</sup><br>(25.8-30.5)  | 31.1 <sup>a</sup><br>(28.3-33.9)     | 36.7 <sup>a</sup><br>(34.0-39.4)  |
|                       | No                   | -                                    | -                                 | 16.1 <sup>a</sup><br>(11.7-21.9)     | 22.5 <sup>a</sup><br>(17.9-27.9)  | 30.9 <sup>a</sup><br>(26.5-35.6)     | 33.4 <sup>a</sup><br>(29.4-37.8)  |
| Mother's Schooling    | Primary              | 16.4 <sup>a</sup><br>(12.7-20.9)     | 25.2 <sup>a</sup><br>(21.4-29.5)  | 20.4 <sup>a</sup><br>(17.7-23.5)     | 25.2 <sup>a</sup><br>(22.3-28.4)  | 26.6 <sup>a</sup><br>(20.3-34.0)     | 38.8 <sup>a</sup><br>(33.0-44.9)  |
|                       | Secondary            | 12.5 <sup>ab</sup><br>(10.6-14.7)    | 23.9 <sup>a</sup><br>(21.1-26.9)  | 14.1 <sup>b</sup><br>(12.2-16.2)     | 30.4 <sup>a</sup><br>(27.5-33.4)  | 30.8 <sup>a</sup><br>(27.8-34.1)     | 41.5 <sup>a</sup><br>(38.3-44.7)  |
|                       | Higher secondary     | 8.3 <sup>b</sup><br>(5.9-11.5)       | 16.2 <sup>b</sup><br>(12.9-20.2)  | 17.1 <sup>ab</sup><br>(13.0-22.2)    | 32.5 <sup>ab</sup><br>(27.3-38.0) | 30.0 <sup>a</sup><br>(20.2-42.2)     | 41.9 <sup>a</sup><br>(31.0-53.6)  |
|                       | Graduate and above   | 16.9 <sup>ab</sup><br>(7.9-32.4)     | 16.9 <sup>ab</sup><br>(12.6-22.3) | 14.4 <sup>ab</sup><br>(9.0-22.3)     | 23.4 <sup>ab</sup><br>(19.5-27.8) | 28.4 <sup>a</sup><br>(22.4-35.3)     | 34.4 <sup>a</sup><br>(27.8-41.6)  |
| Father's Occupation   | Professional         | 11.6 <sup>a</sup><br>(8.1-16.3)      | 17.0 <sup>a</sup><br>(13.1-21.8)  | 17.7 <sup>a</sup><br>(13.6-22.9)     | 21.1 <sup>a</sup><br>(17.1-25.7)  | 37.1 <sup>a</sup><br>(28.6-46.5)     | 23.1 <sup>a</sup><br>(18.7-28.1)  |
|                       | Sales and services   | 11.5 <sup>a</sup><br>(8.9-14.8)      | 22.3 <sup>ab</sup><br>(19.6-25.3) | 14.7 <sup>a</sup><br>(11.8-18.3)     | 30.4 <sup>b</sup><br>(27.4-33.6)  | 27.9 <sup>a</sup><br>(24.6-31.4)     | 39.5 <sup>b</sup><br>(35.9-43.1)  |
|                       | Manual, Agriculture  | 13.8 <sup>a</sup><br>(11.6-16.3)     | 25.7 <sup>b</sup><br>(22.3-29.4)  | 17.5 <sup>a</sup><br>(15.3-20.0)     | 30.0 <sup>b</sup><br>(27.0-33.1)  | 31.2 <sup>a</sup><br>(28.5-34.0)     | 39.3 <sup>b</sup><br>(36.0-42.7)  |
|                       | Others               | 20.0 <sup>a</sup><br>(11.7-31.9)     | 16.5 <sup>ac</sup><br>(12.1-22.0) | 20.7 <sup>a</sup><br>(15.5-27.2)     | 17.1 <sup>ac</sup><br>(13.4-21.5) | 31.7 <sup>a</sup><br>(26.7-37.1)     | 23.6 <sup>ac</sup><br>(19.4-28.3) |
| Wealth Index          | Poorest              | 13.8 <sup>a</sup><br>(10.2-18.4)     | 19.9 <sup>a</sup><br>(14.9-26.1)  | 22.2 <sup>a</sup><br>(17.8-27.3)     | 20.7 <sup>a</sup><br>(15.4-27.1)  | 30.7 <sup>a</sup><br>(25.0-37.0)     | 27.0 <sup>a</sup><br>(21.6-33.2)  |
|                       | Poor                 | 15.0 <sup>a</sup><br>(10.1-21.6)     | 23.3 <sup>a</sup><br>(18.2-29.2)  | 14.7 <sup>a</sup><br>(11.7-18.4)     | 23.5 <sup>a</sup><br>(20.0-27.4)  | 28.0 <sup>a</sup><br>(23.2-33.3)     | 32.0 <sup>ab</sup><br>(27.8-36.6) |
|                       | Middle               | 13.9 <sup>a</sup><br>(10.3-18.5)     | 25.1 <sup>a</sup><br>(21.3-29.3)  | 18.0 <sup>a</sup><br>(14.8-21.6)     | 29.6 <sup>ab</sup><br>(26.0-33.5) | 30.0 <sup>a</sup><br>(25.7-34.7)     | 35.9 <sup>ab</sup><br>(32.1-39.9) |
|                       | Rich                 | 13.1 <sup>a</sup><br>(9.7-17.5)      | 24.4 <sup>a</sup><br>(21.2-28.0)  | 16.8 <sup>a</sup><br>(14.2-19.9)     | 33.6 <sup>b</sup><br>(30.4-37.0)  | 33.5 <sup>a</sup><br>(29.7-37.6)     | 40.3 <sup>b</sup><br>(36.2-44.6)  |
|                       | Richest              | 13.2 <sup>a</sup><br>(9.8-17.6)      | 20.2 <sup>a</sup><br>(17.4-23.2)  | 15.0 <sup>a</sup><br>(11.6-19.2)     | 29.6 <sup>ab</sup><br>(26.6-32.8) | 32.9 <sup>a</sup><br>(29.2-36.9)     | 42.0 <sup>b</sup><br>(37.2-47.0)  |
| Drinking water source | Piped & Improved     | 13.3 <sup>a</sup><br>(11.2-15.8)     | 21.0 <sup>a</sup><br>(18.7-23.4)  | 17.4 <sup>a</sup><br>(15.5-19.4)     | 26.3 <sup>a</sup><br>(24.0-28.6)  | 31.1 <sup>a</sup><br>(28.5-33.9)     | 33.3 <sup>a</sup><br>(30.8-36.0)  |
|                       | Non-piped & Improved | 19.7 <sup>a</sup><br>(10.6-33.6)     | 32.3 <sup>b</sup><br>(26.4-38.8)  | 17.9 <sup>a</sup><br>(9.7-30.8)      | 33.6 <sup>ab</sup><br>(26.3-41.9) | 32.5 <sup>a</sup><br>(28.0-37.3)     | 48.0 <sup>b</sup><br>(40.4-55.6)  |
|                       | Unimproved           | 12.1 <sup>a</sup><br>(7.9-18.1)      | 35.8 <sup>ab</sup><br>(23.0-51.0) | 15.9 <sup>a</sup><br>(11.9-21.0)     | 39.2 <sup>b</sup><br>(30.4-48.8)  | 29.6 <sup>a</sup><br>(22.2-38.2)     | 54.7 <sup>b</sup><br>(45.7-63.5)  |
| Hand washing          | Basic                | 13.4 <sup>a</sup><br>(10.4-17.1)     | 23.0 <sup>a</sup><br>(20.3-25.9)  | 17.2 <sup>a</sup><br>(15.3-19.3)     | 28.7 <sup>a</sup><br>(26.3-31.3)  | 32.7 <sup>a</sup><br>(29.9-35.7)     | 38.0 <sup>a</sup><br>(35.0-41.1)  |
|                       | Limited              | 14.0 <sup>a</sup>                    | 26.0 <sup>a</sup>                 | 16.3 <sup>a</sup>                    | 28.5 <sup>ab</sup>                | 30.6 <sup>a</sup>                    | 36.0 <sup>ab</sup>                |

|            |                       |                                  |                                  |                                  |                                   |                                  |                                   |
|------------|-----------------------|----------------------------------|----------------------------------|----------------------------------|-----------------------------------|----------------------------------|-----------------------------------|
|            |                       | (11.5-16.9)                      | (22.3-29.9)                      | (13.7-19.3)                      | (24.9-32.4)                       | (26.6-34.8)                      | (32.2-39.9)                       |
|            | No facility           | 14.7 <sup>a</sup><br>(9.2-22.7)  | 14.1 <sup>b</sup><br>(10.6-18.5) | 20.2 <sup>a</sup><br>(14.5-27.5) | 21.3 <sup>b</sup><br>(17.4-25.7)  | 27.0 <sup>a</sup><br>(22.6-32.0) | 28.0 <sup>b</sup><br>(22.7-33.9)  |
| Sanitation | Improved & Not shared | 11.9 <sup>a</sup><br>(9.3-15.0)  | 24.1 <sup>a</sup><br>(21.4-27.0) | 16.2 <sup>a</sup><br>(13.5-19.3) | 32.2 <sup>a</sup><br>(29.6-34.9)  | 31.0 <sup>a</sup><br>(28.5-33.7) | 39.3 <sup>a</sup><br>(36.3-42.5)  |
|            | Improved & Shared     | 12.9 <sup>a</sup><br>(9.5-17.3)  | 19.8 <sup>a</sup><br>(16.0-24.3) | 13.8 <sup>a</sup><br>(10.9-17.4) | 25.8 <sup>ab</sup><br>(22.4-29.5) | 27.2 <sup>a</sup><br>(22.5-32.4) | 35.3 <sup>ab</sup><br>(30.7-40.0) |
|            | Unimproved            | 15.9 <sup>a</sup><br>(12.8-19.6) | 22.4 <sup>a</sup><br>(18.8-26.5) | 19.2 <sup>a</sup><br>(16.4-22.3) | 24.4 <sup>b</sup><br>(21.0-28.2)  | 31.6 <sup>a</sup><br>(27.7-35.8) | 31.8 <sup>b</sup><br>(27.9-36.1)  |

Superscripts <sup>abc</sup> with different letters in the same column indicate estimates with non-overlapping CI

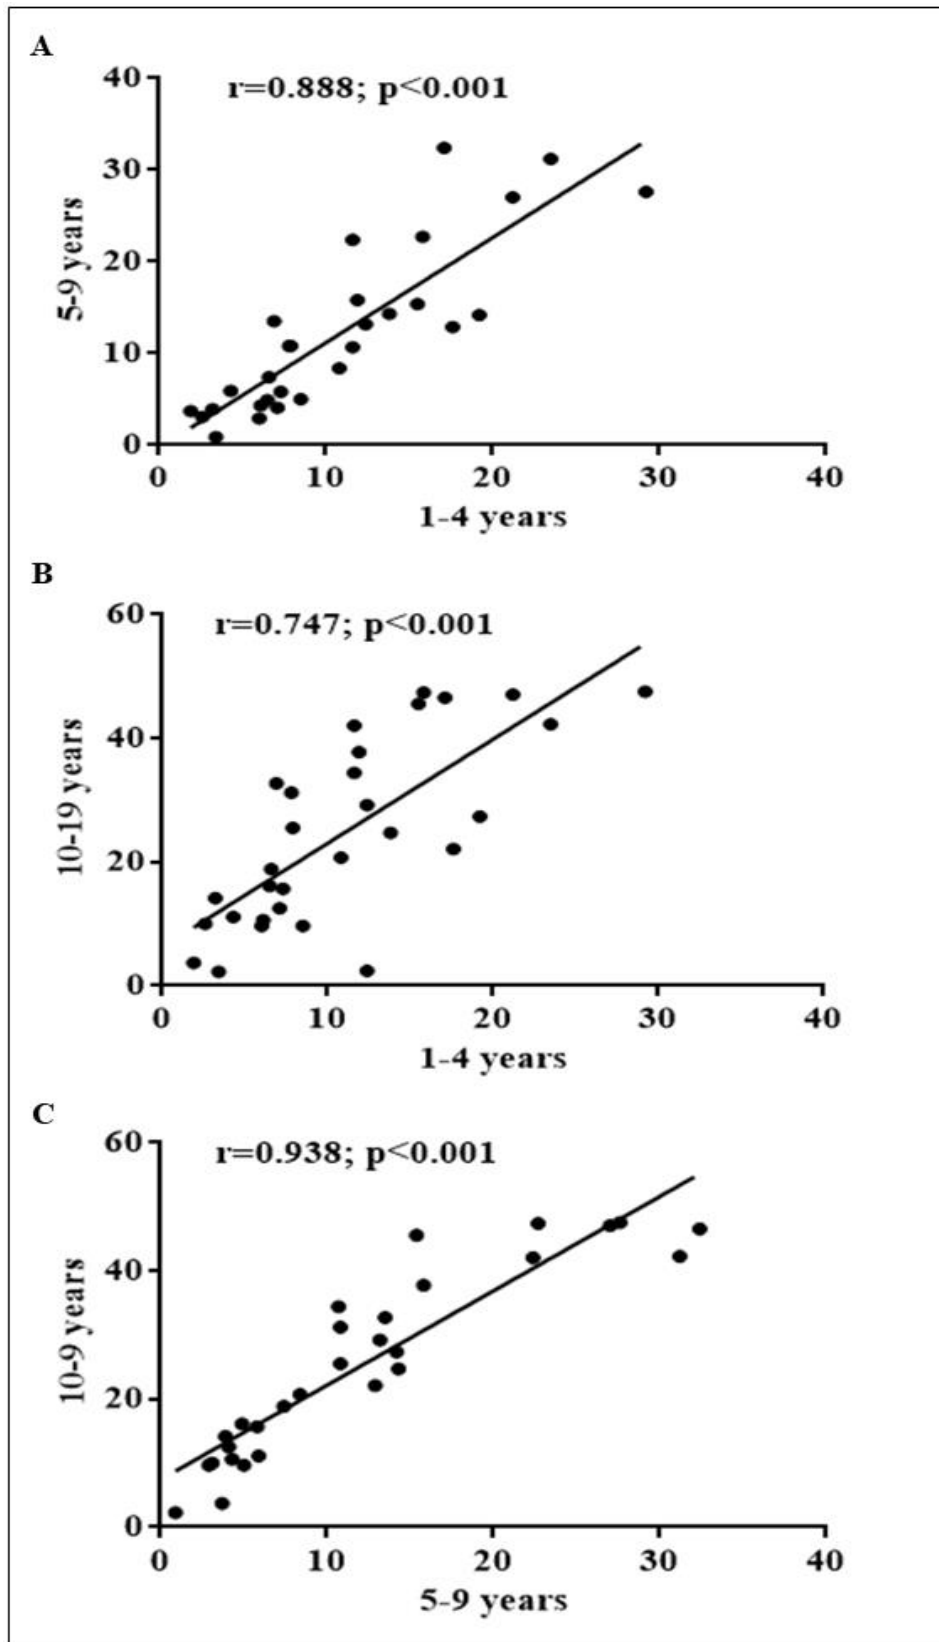

**Supplementary Figure S1A.** Association between the vitamin B<sub>12</sub> prevalence by state across all the age groups (A) 1-4 years vs 5-9 years (B) 1-4 years vs 10-19 years and (C) 5-9 years vs 10-19 years.

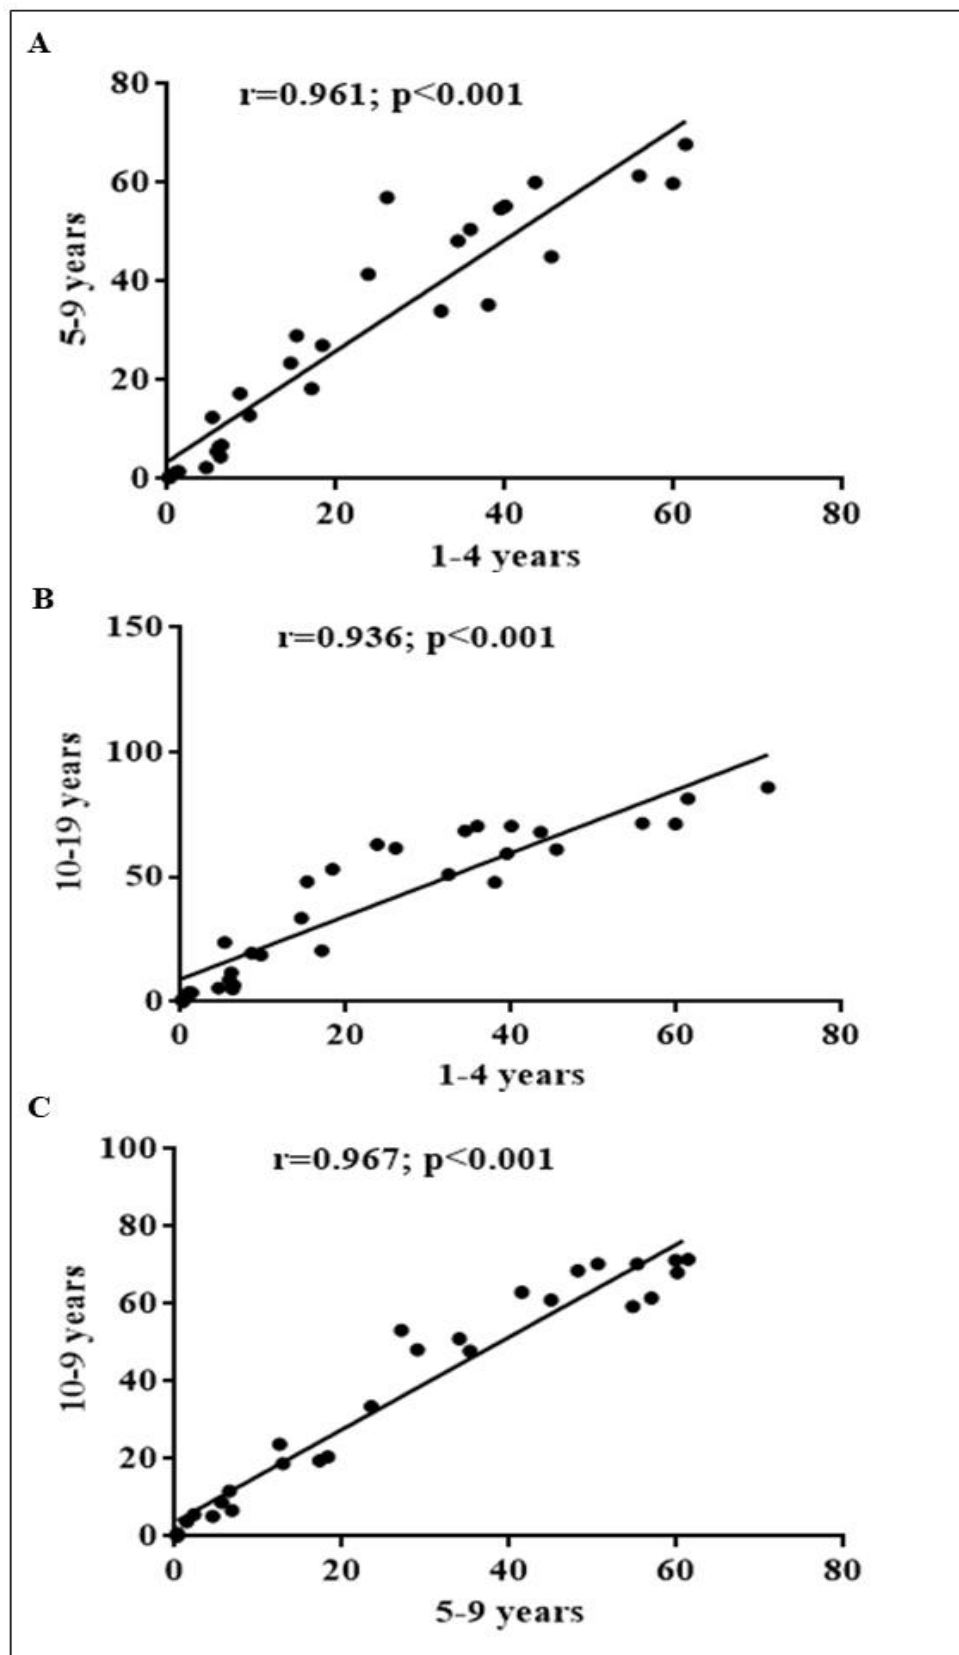

**Supplementary Figure S1B.** Association between the folate prevalence by state across all the age groups (A) 1-4 years vs 5-9 years (B) 1-4 years vs 10-19 years and (C) 5-9 years vs 10-19 years.
